# Supplementary material for: Site preference and defect engineering of a highly efficient blue-emitting phosphor Sr2SiO4:Ce3+/K+ toward thermally enhanced luminescence
Source: Royal Society of Chemistry journal article supplement (doi:10.1039/d3qi00180f), 2023-01-01
Supplement: d3qi00180f1.pdf [file d3qi00180f1.pdf]

## Supporting Information

### Site Preference and Defect Engineering of a Highly Efficient Blue-Emitting Phosphor $\text{Sr}_2\text{SiO}_4:\text{Ce}^{3+}/\text{K}^+$ Toward Thermally Enhanced Luminescence

Kai Zhao,<sup>a,#</sup> Zhihong Ma,<sup>a,#</sup> Li Yin,<sup>a</sup> Bin Hui,<sup>a</sup> Han Si,<sup>a</sup> Xinlin Tong,<sup>b</sup> Huidong  
Tang,<sup>c</sup> Peng Cao,<sup>d</sup> Saifang Huang<sup>a\*</sup>

<sup>a</sup> School of Materials Science and Engineering, Jiangsu University of Science and  
Technology, Zhenjiang 212003, P. R. China

<sup>b</sup> School of Materials Science and Engineering, Changzhou University, Changzhou  
213164, P. R. China

<sup>c</sup> Department of Chemistry and Materials Engineering, Changzhou Vocational Institute  
of Engineering, Changzhou 213164, P. R. China

<sup>d</sup> Department of Chemical and Materials Engineering, The University of Auckland,  
Private Bag 92019, Auckland 1142, New Zealand

\*Corresponding Author: [s.huang@just.edu.cn](mailto:s.huang@just.edu.cn)

# These authors contributed equally.

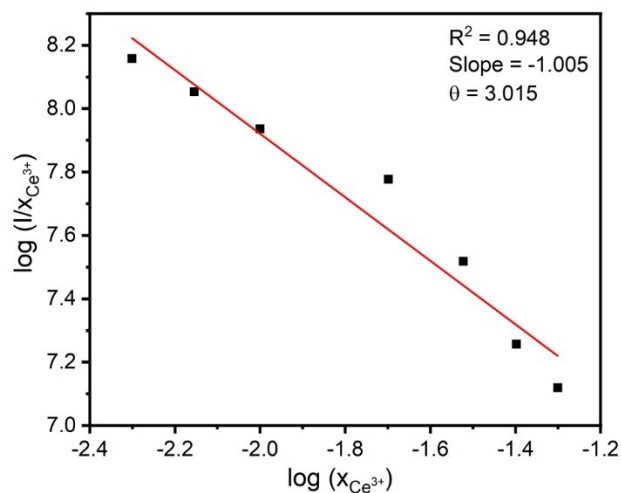

**Figure S1.** Fitting results of  $\log(I/x)$  as a function of  $\log(x)$  for  $\text{Sr}_2\text{SiO}_4:0.02\text{Ce}^{3+}/0.02\text{K}^+$

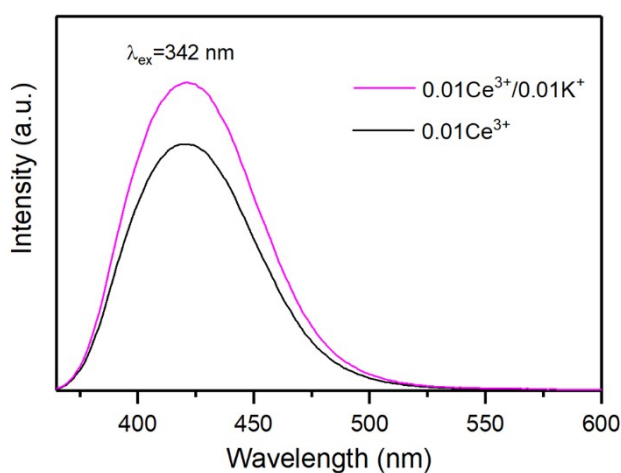

**Figure S2.** The comparison of emission intensity of  $\text{Sr}_2\text{SiO}_4:0.01\text{Ce}^{3+}$  and  $\text{Sr}_2\text{SiO}_4:0.01\text{Ce}^{3+}/0.01\text{K}^+$

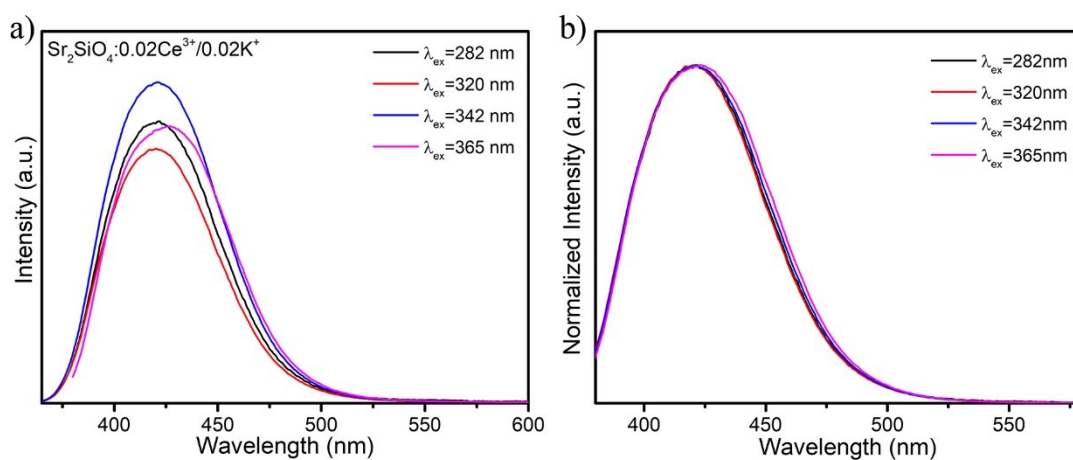

**Figure S3.** a) PL spectra and b) normalized PL spectra of  $\text{Sr}_2\text{SiO}_4:0.02\text{Ce}^{3+}/0.02\text{K}^+$  at different excitation wavelengths.

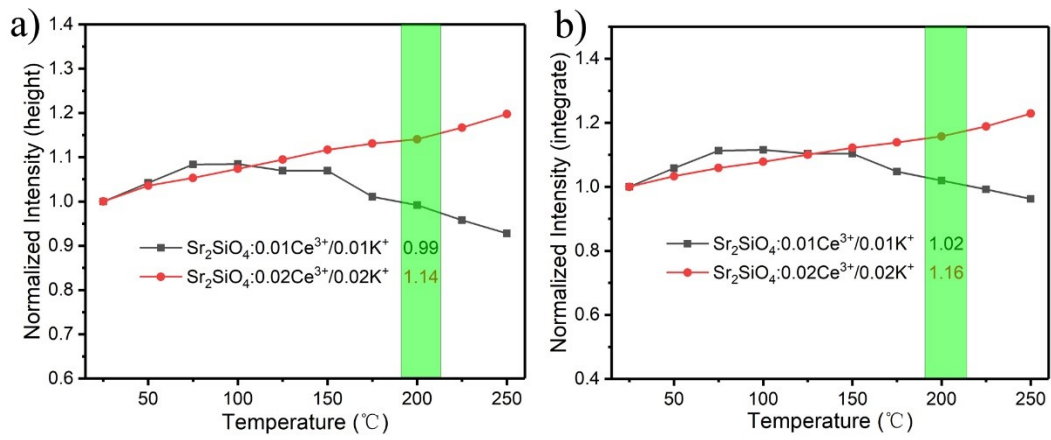

**Figure S4.** Comparison of thermal stability of  $\text{Sr}_2\text{SiO}_4:\text{xCe}^{3+}/\text{xK}^+$  under the excitation at 342 nm. (a) peak intensity, and (b) integrated intensity.

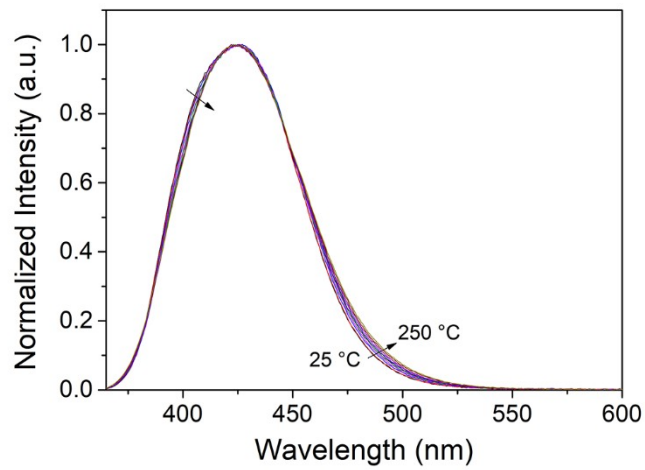

**Figure S5.** The normalized temperature-dependent PL spectra of  $\text{Sr}_2\text{SiO}_4:0.02\text{Ce}^{3+}/0.02\text{K}^+$

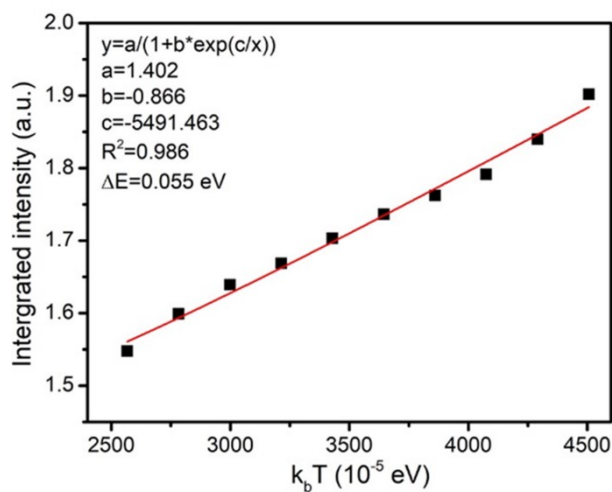

**Figure S6.** The fitting of  $I_T$  again  $kT$  for activation energy  $\Delta E$

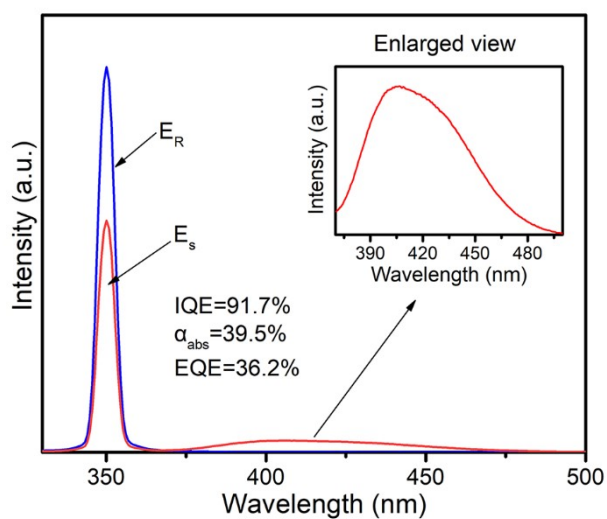

**Figure S7.** The measured spectra of  $\text{Sr}_2\text{SiO}_4:0.02\text{Ce}^{3+}/0.02\text{K}^+$  and the calculated quantum efficiencies.

**Table S1.** Lifetime fitting values under different  $\text{Ce}^{3+}$  concentrations

| y           | 0.005   | 0.007   | 0.01    | 0.02    | 0.03    | 0.04    | 0.05    |
|-------------|---------|---------|---------|---------|---------|---------|---------|
| $y_0$       | 11.55   | 12.53   | 12.90   | 12.69   | 13.44   | 13.62   | 15.88   |
| A           | 9597.73 | 9826.21 | 9896.56 | 9674.01 | 9817.82 | 9879.12 | 9767.34 |
| $\tau$ (ns) | 27.84   | 28.08   | 28.19   | 28.44   | 28.83   | 28.65   | 27.98   |
